# Supplementary material for: Effects of Allium macrostemon Bunge Extract on Adipose Tissue Inflammation and Hepatic Endoplasmic Reticulum Stress in High-Fat Diet-Fed and Bisphenol A-Treated C57BL/6N Mice
Source: MDPI journal article supplement (doi:10.3390/foods12203777), 2023-10-14
Supplement: s1 [file s1]

## Supplementary Materials

**Table S1.** Primer sequences used in quantitative real-time PCR

| Gene <sup>1</sup>           |                  | Forward (5'→3')                | Reverse (5'→3')               |
|-----------------------------|------------------|--------------------------------|-------------------------------|
| <i>Inflammation markers</i> | <i>F4/80</i>     | GGC CAT TGC CCA GAT TTT C      | CGG TTG AGC AGA CAG TGA ATG A |
|                             | <i>IL-1B</i>     | GCA ACT GTT CCT GAA CTC AAC T  | ATC TTT TGG GGT CCG TCA ACT   |
|                             | <i>NOS2</i>      | CAG CTG GGC TGT ACA AAC CTT    | CAT TGG AAG TGA AGC GTT TCG   |
|                             | <i>TNF-α</i>     | TGG CCT CCC TCT CAT CAG TT     | CAG GCT TGT CAC TCG AAT TTT G |
| <i>Antioxidant enzymes</i>  | <i>CAT</i>       | TGG ACA AGT ACA ACG CTG AGA AG | AGC CGG CCT GCG TGT AG        |
|                             | <i>GPX</i>       | GGC TCA CCC GCT CTT TAC C      | GGG TCG TCA CTG GGT GTT G     |
|                             | <i>SOD1</i>      | GGC CCG GCG GAT GA             | GTC CTT TCC AGC AGT CAC ATT G |
|                             | <i>SOD2</i>      | GCT GCA CCA CAG CAA GCA        | CTC GGT GGC GTT GAG ATT G     |
|                             | <i>TRX2</i>      | CAG CCT CTG GCA CAT TTC CT     | TGT TCG GCT TCT GGT TTC CT    |
| <i>ER stress markers</i>    | <i>GRP78/Bip</i> | ACC CTT ACT CGG GCC AAA TT     | GCT TCA TGG TAG AGC GGA ACA   |
|                             | <i>CHOP</i>      | GCA TGA ACA GTG GGC ATC AC     | CGA TGG TGC TGG GTA CAC TTC   |
| <i>Endogenous control</i>   | <i>18s rRNA</i>  | AAC CCG TTG AAC CCC ATT        | CCA TCC AAT CGG TAG TAG CG    |

<sup>1</sup> *F4/80*, adhesion G protein-coupled receptor E1; *IL-1β*, Interleukin-1β; *NOS2*, Nitric oxide synthase 2, inducible; *TNF-α*, Tumor necrosis factor-α; *CAT*, Catalase; *GPX*, Glutathione peroxidase 1; *SOD1*, Superoxide dismutase 1, soluble; *SOD2*, Superoxide dismutase 2, soluble; *Trx2*, Thioredoxin 2; *GRP78/Bip*, 78-kDa glucose-regulated protein/binding immunoglobulin protein; *CHOP*, C/EBP homologous protein; *18s rRNA*, 18s ribosomal RNA.
